# Supplementary material
Source: PubMed Central journal article supplement (PMC10619637)
Supplement: ehp12314.smcontents.508.pdf [file ehp12314.smcontents.508.pdf]

**Note to readers with disabilities:** *EHP* strives to ensure that all journal content is accessible to all readers. However, some figures and Supplemental Material published in *EHP* articles may not conform to [508 standards](#) due to the complexity of the information being presented. If you need assistance accessing journal content, please contact [ehp508@niehs.nih.gov](mailto:ehp508@niehs.nih.gov). Our staff will work with you to assess and meet your accessibility needs within 3 working days.

### **Supplemental Material**

#### **Opportunities to Interrupt Transmission of Enteropathogens of Poultry Origin in Maputo, Mozambique: A Transmission Model Analysis**

Kayoko Shioda, Andrew F. Brouwer, Frederica Lamar, Hermógenes N. Mucache, Karen Levy, and Matthew C. Freeman

#### **Table of Contents**

**Table S1.** The estimated proportion of illnesses caused by each transmission pathway for the AFR E region, reported in the WHO FERG report 2007-2015.

**Table S2.** Changes in the simulated steady-state prevalence of *Campylobacter* infection after intervention (50% reduction in each transmission rate).

**Table S3.** Changes in the simulated steady-state prevalence of *Salmonella* infection after intervention (50% reduction in each transmission rate).

**Figure S1.** Prior and posterior distributions of the prevalence of total infection and contribution of each pathway to the force of infection for *Campylobacter* (A) and *Salmonella* (B).

**Figure S2.** Changes in the simulated steady-state prevalence of total infection of *Shigella* (*I*) after reducing the transmission rate for each pathway.

**R script 1: campy.R**

**R script 2: salm.R**
